# Supplementary material
Source: publisher figshare collection journal article supplement (https://sage.figshare.com/ndownloader/files/23184272)
Supplement: Supplementary file 1 [file 23184272]

## Appendix A.

*Logistic regression models for 32-point Phonics Screening Check threshold values when the WARL was administered at three timepoints.*

| Measure        | R <sup>2</sup> | Variable | $\beta$ (SE)    | 95% CI for Odds Ratio |            |       | Wald           |
|----------------|----------------|----------|-----------------|-----------------------|------------|-------|----------------|
|                |                |          |                 | Lower                 | Odds Ratio | Upper |                |
| <b>WARL T1</b> | <b>** .379</b> | WARL     | -0.09<br>(0.02) | 0.89                  | 0.92       | 0.95  | <b>**23.80</b> |
|                |                | Constant | 2.19<br>(0.61)  | -                     | 8.92       | -     | <b>**12.70</b> |
| <b>WARL T3</b> | <b>** .429</b> | WARL     | -0.08<br>(0.02) | 0.89                  | 0.92       | 0.95  | <b>**27.70</b> |
|                |                | Constant | 2.98<br>(0.72)  | -                     | 19.68      | -     | <b>**17.06</b> |
| <b>WARL T4</b> | <b>** .399</b> | WARL     | -0.08<br>(0.01) | 0.90                  | 0.93       | 0.90  | <b>**27.44</b> |
|                |                | Constant | 3.63<br>(0.87)  | -                     | 37.77      | -     | <b>**17.55</b> |

*Note.* Model R<sup>2</sup> = Nagelkerke statistic. WARL = Wheldall Assessment of Reading Lists. \* =  $p < .01$ ; \*\* =  $p < .001$ .

## Appendix B.

*Logistic regression models for 32-point Phonics Screening Check threshold values when the WARN was administered at three timepoints.*

| Measure        | R <sup>2</sup> | Variable | $\beta$ (SE)    | 95% CI for Odds Ratio |            |       | Wald           |
|----------------|----------------|----------|-----------------|-----------------------|------------|-------|----------------|
|                |                |          |                 | Lower                 | Odds Ratio | Upper |                |
| <b>WARN T1</b> | <b>** .463</b> | WARN     | -0.34<br>(0.07) | 0.62                  | 0.71       | 0.81  | <b>**24.62</b> |
|                |                | Constant | 3.49<br>(0.84)  | -                     | 32.83      | -     | <b>**17.44</b> |
| <b>WARN T3</b> | <b>** .519</b> | WARN     | -0.30<br>(0.06) | 0.66                  | 0.74       | 0.83  | <b>**28.64</b> |
|                |                | Constant | 3.85<br>(0.84)  | -                     | 46.78      | -     | <b>**20.86</b> |
| <b>WARN T4</b> | <b>** .491</b> | WARN     | -0.24<br>(0.04) | 0.72                  | 0.79       | 0.85  | <b>**31.94</b> |
|                |                | Constant | 4.06<br>(0.87)  | -                     | 58.16      | -     | <b>**21.73</b> |

*Note.* Model R<sup>2</sup> = Nagelkerke statistic. WARN = Wheldall Assessment of Reading

Nonwords. \* =  $p < .01$ ; \*\* =  $p < .001$ .

## Appendix C.

*Results from receiver operating characteristic (ROC) analyses with 32-point Phonics*

*Screening Check threshold.*

| Measure        | AUC  | Specificity | Score |
|----------------|------|-------------|-------|
| <b>WARL T1</b> | .831 | 61%         | 27.0  |
| <b>WARL T3</b> | .852 | 65%         | 39.5  |
| <b>WARL T4</b> | .842 | 64%         | 53.2  |
| <b>WARN T1</b> | .863 | 55%         | 10.1  |
| <b>WARN T3</b> | .888 | 73%         | 13.5  |
| <b>WARN T4</b> | .872 | 64%         | 18.0  |

*Note.* AUC = Area under the curve; WARL = Wheldall Assessment of Reading Lists; WARN

= Wheldall Assessment of Reading Nonwords.
